# Supplementary material
Source: publisher site journal article supplement (https://www.dovepress.com/article/318657)
Supplement: Supplementary file 1 [file get_supplementary_file.php]

**Supplementary Materials**

Table S1 Accuracy (in %) results from Experiment 1

| **Conditions** | **HE group** | |  | **LE group** | |
| --- | --- | --- | --- | --- | --- |
| *M* | *SD* |  | *M* | *SD* |
| Valid cue | 97.36 | 3.23 |  | 95.88 | 3.32 |
| Invalid cue | 96.84 | 3.56 |  | 96.60 | 3.70 |
| Neutral cue | 97.44 | 2.86 |  | 96.80 | 2.65 |

HE: high empathy; LE: low empathy

Table S2 Accuracy (in %) results from Experiment 2

| **Conditions** | | **HE group** | |  | **LE group** | |
| --- | --- | --- | --- | --- | --- | --- |
| *M* | *SD* |  | *M* | *SD* |
| Positive stimuli | Valid cue | 97.76 | 4.48 |  | 97.44 | 3.63 |
| Invalid cue | 97.28 | 4.72 |  | 96.64 | 3.95 |
| Negative stimuli | Valid cue | 96.12 | 5.26 |  | 96.00 | 3.65 |
| Invalid cue | 97.28 | 4.86 |  | 96.60 | 4.58 |
| / | Neutral cue | 97.84 | 2.23 |  | 96.40 | 3.16 |

HE: high empathy; LE: low empathy

Table S3 RT (in ms) results from Experiment 1

| **Conditions** | **HE group** | |  | **LE group** | |
| --- | --- | --- | --- | --- | --- |
| *M* | *SD* |  | *M* | *SD* |
| Valid cue | 607.76 | 90.56 |  | 563.94 | 64.91 |
| Invalid cue | 606.99 | 93.00 |  | 562.97 | 69.36 |
| Neutral pairs | 595.84 | 87.28 |  | 554.52 | 65.46 |
| ABS | -1.48 | 20.15 |  | -7.46 | 24.52 |
| ADS | 10.79 | 23.57 |  | 5.20 | 16.93 |

HE: high empathy; LE: low empathy; ABS: attentional bias score; ADS: attentional disengagement score

Table S4 T-test results from Experiment 1

| Attentional scores | *t* | *df* | *p* | 95% confidence interval | |
| --- | --- | --- | --- | --- | --- |
| Lower | Upper |
| ABS (HE vs. LE) | 0.94 | 48 | 0.350 | -6.77 | 18.75 |
| ADS (HE vs. LE) | 0.96 | 48 | 0.340 | -6.08 | 17.26 |
| ABS (HE vs. 0) | -0.37 | 24 | 0.717 | -9.79 | 6.84 |
| ADS (HE vs. 0) | 2.29 | 24 | 0.031 | 1.07 | 20.52 |
| ABS (LE vs. 0) | -1.52 | 24 | 0.141 | -17.59 | 2.66 |
| ADS (LE vs. 0) | 1.54 | 24 | 0.137 | -1.78 | 12.19 |

HE: high empathy; LE: low empathy; ABS: attentional bias score; ADS: attentional disengagement score

Table S5 RT (in ms) results from Experiment 2

| **Conditions** | | **HE group** | |  | **LE group** | |
| --- | --- | --- | --- | --- | --- | --- |
| *M* | *SD* |  | *M* | *SD* |
| Positive stimuli | Valid cue | 545.21 | 66.56 |  | 514.77 | 54.08 |
| Invalid cue | 547.02 | 67.67 |  | 526.41 | 57.54 |
| Negative stimuli | Valid cue | 555.20 | 58.82 |  | 525.95 | 53.93 |
| Invalid cue | 538.28 | 58.37 |  | 524.05 | 56.42 |
| / | Neutral cue | 544.50 | 65.49 |  | 520.01 | 56.37 |
| Positive stimuli | ABS | 1.46 | 32.38 |  | 11.48 | 24.51 |
| ADS | 2.20 | 24.44 |  | 6.10 | 23.84 |
| Negative stimuli | ABS | -16.83 | 29.28 |  | -1.99 | 22.03 |
| ADS | -6.21 | 26.33 |  | 3.92 | 21.43 |

HE: high empathy; LE: low empathy; ABS: attentional bias score; ADS: attentional disengagement score

Table S6 ANOVA results from Experiment 2

| Dependent variable | Effect | Sum-of-squares | Mean square | *F* | *p* |  |
| --- | --- | --- | --- | --- | --- | --- |
| ABS | Emotion | 6302.61 | 6302.61 | 8.48 | 0.005 | 0.15 |
| Group | 3864.11 | 3864.11 | 5.13 | 0.028 | 0.10 |
| Emotion × group | 145.35 | 145.35 | 0.20 | 0.660 | <0.01 |
| ADS | Emotion | 700.18 | 700.18 | 1.66 | 0.204 | 0.03 |
| Group | 1228.57 | 1228.57 | 1.67 | 0.203 | 0.03 |
| Emotion × group | 242.64 | 242.64 | 0.58 | 0.452 | 0.01 |

ABS: attentional bias score; ADS: attentional disengagement score

Table S7 T-test results from Experiment 2

| Attentional scores | *t* | *df* | *p* | 95% confidence interval | |
| --- | --- | --- | --- | --- | --- |
| Lower | Upper |
| ABS_pos (HE vs. 0) | 0.23 | 24 | 0.824 | -11.91 | 14.83 |
| ADS_pos (HE vs. 0) | 0.45 | 24 | 0.657 | -7.89 | 12.29 |
| ABS_neg (HE vs. 0) | -2.87 | 24 | 0.008 | -28.92 | -4.74 |
| ADS_neg (HE vs. 0) | -1.18 | 24 | 0.250 | -17.08 | 4.66 |
| ABS_pos (LE vs. 0) | 2.34 | 24 | 0.028 | 1.36 | 21.60 |
| ADS_pos (LE vs. 0) | 1.28 | 24 | 0.213 | -3.74 | 15.93 |
| ABS_neg (LE vs. 0) | -0.45 | 24 | 0.656 | -11.08 | 7.11 |
| ADS_neg (LE vs. 0) | 0.91 | 24 | 0.370 | -4.93 | 12.76 |

ABS: attentional bias score; ADS: attentional disengagement score; pos: positive stimuli; neg: negative stimuli
